# Supplementary material for: Mung bean-derived carbon dots suppress ferroptosis of Schwann cells via the Nrf2/HO-1/GPX4 pathway to promote peripheral nerve repair
Source: Royal Society of Chemistry journal article supplement (doi:10.1039/d4bm01570c), 2025-01-01
Supplement: d4bm01570c1.pdf [file d4bm01570c1.pdf]

## *Supporting Information*

### **Mung Bean-Derived Carbon Dots Suppress Ferroptosis of Schwann Cells via Nrf2/HO-1/GPX4 Pathway to Promote Peripheral Nerve Repair**

Fei Zheng<sup>1#</sup>, Yumin Zhang<sup>2#</sup>, Hui Zhou<sup>1</sup>, Jiangnan Li<sup>1</sup>, Junyang Gao<sup>1</sup>, Xiaoli Qu<sup>3\*</sup>, Xuejian Wu<sup>1\*</sup>, Siyu Lu<sup>4</sup>, Yuanyi Wang<sup>5\*</sup>, Nan Zhou<sup>1</sup>

1. Department of Orthopedics, The First Affiliated Hospital of Zhengzhou University, Zhengzhou University, Zhengzhou 450052, China;
2. Department of Geriatric Endocrinology, The First Hospital Affiliated to Nanjing Medical University, Nanjing, Jiangsu 210029, China;
3. Erythrocyte Biology Laboratory, School of Life Sciences, Zhengzhou University, Zhengzhou 450001, China;
4. Green Catalysis Center, and College of Chemistry, Zhengzhou University, Zhengzhou 450001, China;
5. Department of Spine Surgery, The First Hospital of Jilin University, Changchun, 130021, China;

# These authors contributed equally: Fei Zheng, Yumin Zhang

Corresponding authors:

Xuejian Wu: [wuxuejianzz@126.com](mailto:wuxuejianzz@126.com)

Xiaoli Qu: [qv1110xiaoli@126.com](mailto:qv1110xiaoli@126.com)

Yuanyi Wang: [wangyuanyi@jlu.edu.cn](mailto:wangyuanyi@jlu.edu.cn)

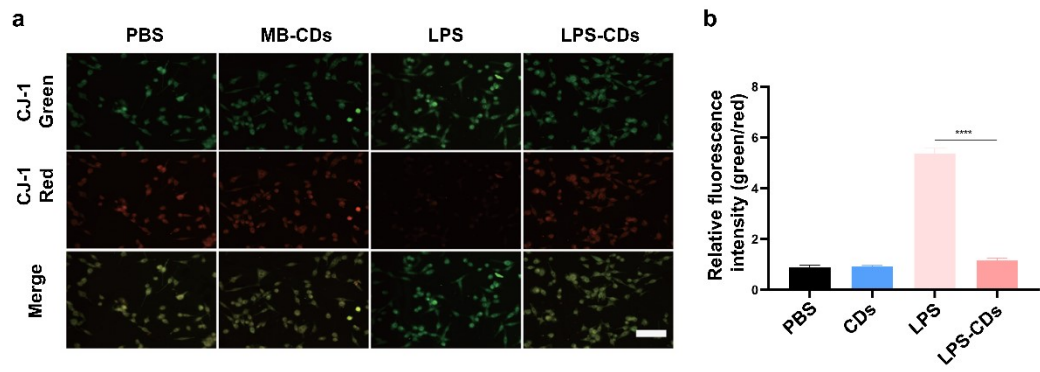

**Figure S1. Mitochondrial membrane potential.** (a) Effects of MB-CDs on the  $\Delta\Psi_m$  in LPS-stimulated SC. Scale bar, 50  $\mu\text{m}$ . (b) Data were expressed as the mean  $\pm$  SD (n = 3). \*\*\*\* $P$  < 0.0001.

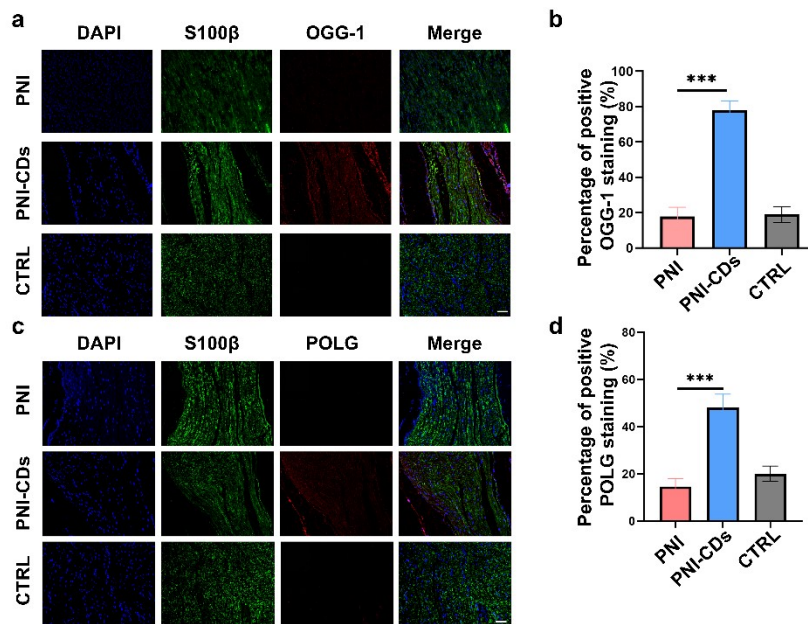

**Figure S2. Expression of mitochondrial repair related proteins and cellular stress response**

**related proteins. (a)** OGG-1 (red) and S100β (green) double immunofluorescence staining of

sciatic nerve longitudinal sections at 7 days following the operation. Nuclei were stained with DAPI.

Scale bar, 50 μm. **(b)** Statistical analysis of different groups. The data are expressed as mean ± SD

(n=3). **(c)**. POLG (red) and S100β (green) double immunofluorescence staining of sciatic nerve

longitudinal sections at 7 days following the operation. Nuclei were stained with DAPI. Scale bar,

50 μm. **(d)** Statistical analysis of different groups. The data are expressed as mean ± SD (n=3).

\*\*\* $P < 0.001$

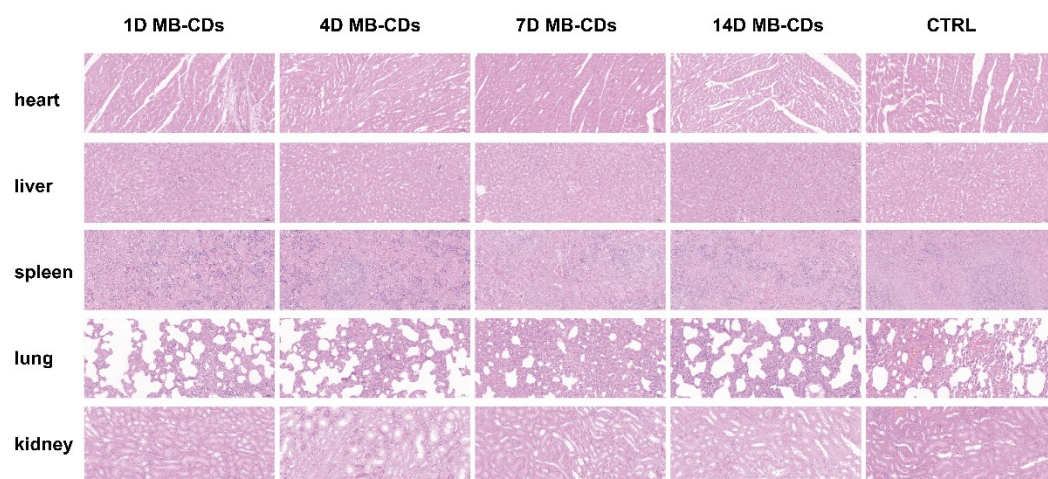

**Figure S3. The biosafety of MB-CDs in vivo.** Scale bar, 50  $\mu$ m.

**Figure 6c**

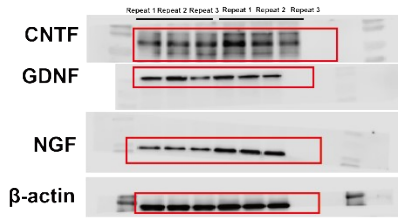

**Figure 9f**

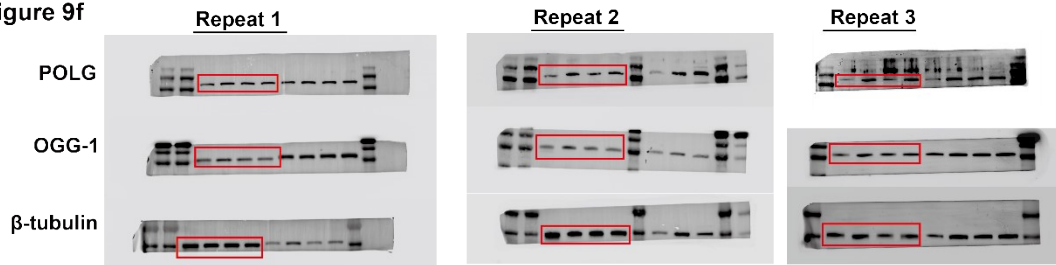

**Figure 9i**

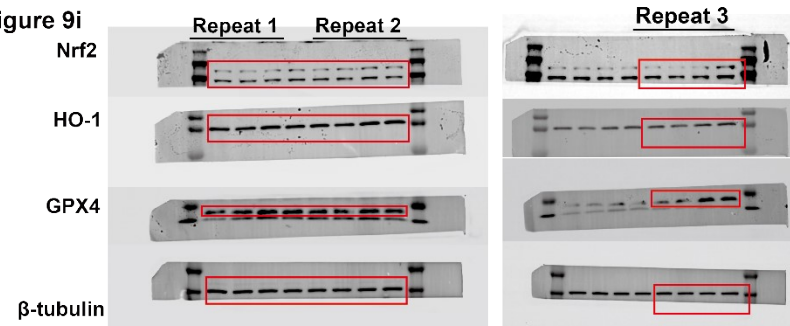

**Figure 9m**

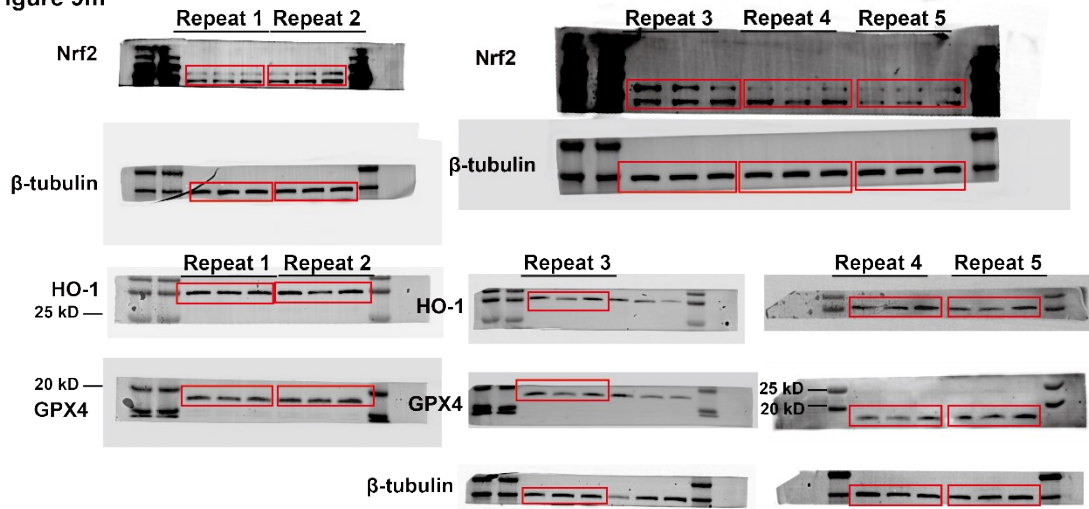

**Figure S4. Uncropped and unprocessed gels for western blots.**

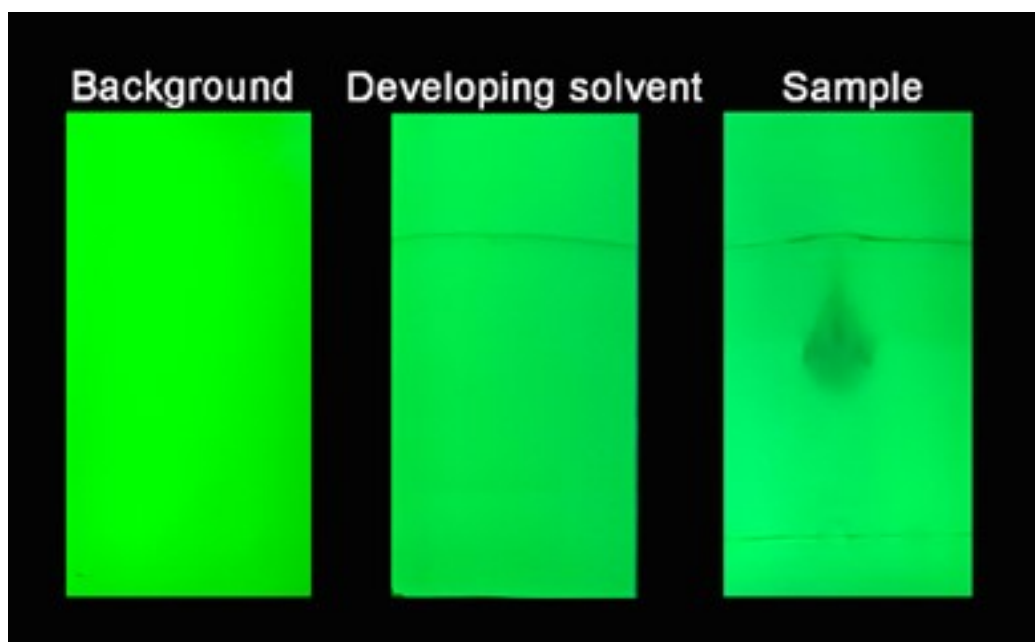

**Figure S5. Thin layer chromatographic analysis of Mung Bean carbon dots (methanol: ethyl acetate = 2:3)**
